# Supplementary material for: Outcomes of primary membranous nephropathy based on serum anti-phospholipase A2 receptor antibodies and glomerular phospholipase A2 receptor antigen status: a retrospective cohort study
Source: PubMed Central journal article supplement (PMC7470143; doi:10.1080/0886022x.2020.1792315), 2020-07-17
Supplement: IRNF_A_1792315_SM2187.pdf [file IRNF_A_1792315_SM2187.pdf]

Supplemental Table S1. Scoring of the chronic lesions in individual renal tissue compartments

| Tissue compartment <sup>a</sup>  | Score                                   |                                              |        |      |
|----------------------------------|-----------------------------------------|----------------------------------------------|--------|------|
|                                  | 0                                       | 1                                            | 2      | 3    |
| Glomerulosclerosis (GS score)    | <10%                                    | 10-25%                                       | 26-50% | >50% |
| Interstitial fibrosis (IF score) | <10%                                    | 10-25%                                       | 26-50% | >50% |
| Tubular atrophy (TA score)       | <10%                                    | 10-25%                                       | 26-50% | >50% |
| Arteriosclerosis (CV score)      | Intimal thickening < thickness of media | Intimal thickening $\geq$ thickness of media |        |      |

<sup>a</sup> The GS score includes the percentage of glomeruli with global and segmental sclerosis and ischemic glomeruli; IF and TA score includes the percentage of renal cortex involved by interstitial fibrosis and tubular atrophy, respectively; CV score includes the severity of arteriosclerosis determined by the extent of thickening of the intima.
